# Supplementary material for: Monodisperse NaYbF4 : Tm3+/NaGdF4 core/shell nanocrystals with near-infrared to near-infrared upconversion photoluminescence and magnetic resonance properties
Source: Royal Society of Chemistry journal article supplement (doi:10.1039/c0nr01018a), 2011-01-01
Supplement: c0nr01018a.pdf [file c0nr01018a.pdf]

## Supplementary Materials

### Monodisperse $\text{NaYbF}_4:\text{Tm}^{3+}/\text{NaGdF}_4$ core/shell nanocrystals with near-infrared to near-infrared upconversion photoluminescence and magnetic resonance properties

Guanying Chen,<sup>† ‡</sup> Tymish Y. Ohulchanskyy,<sup>†\*</sup> Wing Cheung Law,<sup>†</sup> Hans Ågren,<sup>‡</sup> and Paras N. Prasad<sup>†\*</sup>

<sup>†</sup>Institute for Lasers, Photonics, and Biophotonics, The State University of New York University at Buffalo, Buffalo, New York 14260

<sup>‡</sup>Department of Theoretical Chemistry, Royal Institute of Technology, S-10691 Stockholm, Sweden

\*Corresponding Authors. E-mails: [tyo2@buffalo.edu](mailto:tyo2@buffalo.edu), [pnprasad@buffalo.edu](mailto:pnprasad@buffalo.edu)

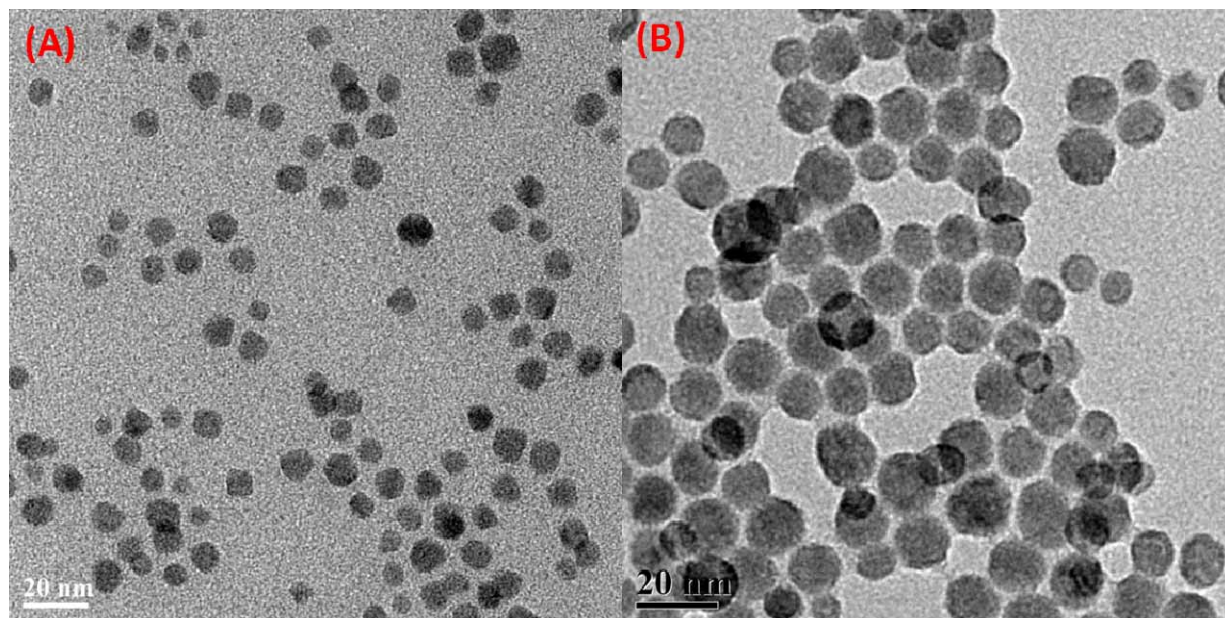

**Figure S1.** Transmission electron images with higher magnification times for (A)  $\text{NaYbF}_4:2\% \text{Tm}^{3+}$  core and (B)  $(\text{NaYbF}_4:\text{Tm } 2\%)/\text{NaGdF}_4$  core/shell powders.

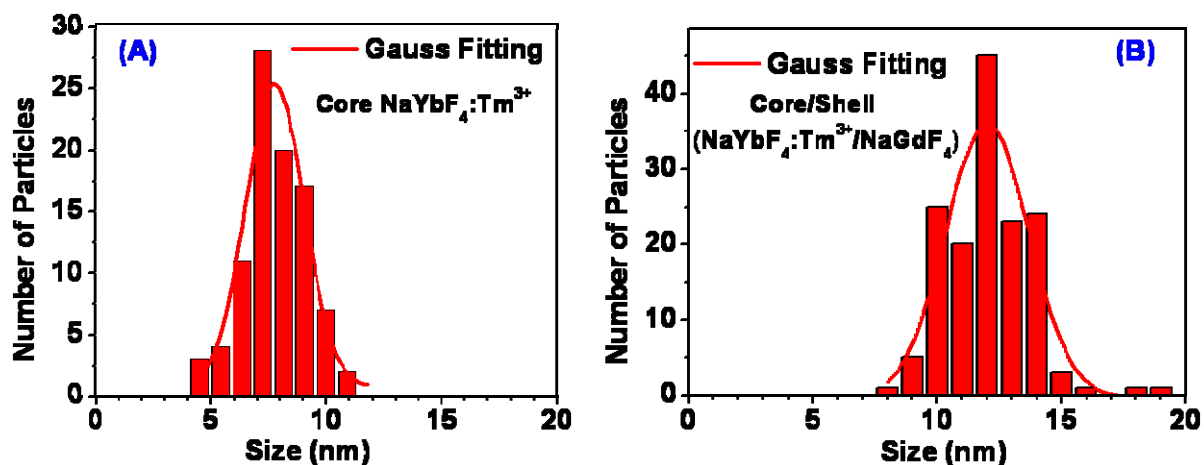

**Figure S2.** Histograms of the size distribution of (A) NaYbF<sub>4</sub>:2% Tm<sup>3+</sup> core and (B) (NaYbF<sub>4</sub>:Tm 2%)/NaGdF<sub>4</sub> core/shell nanocrystals.

**Table S1.** *d*-spacing values for NaYbF<sub>4</sub>:2% Tm<sup>3+</sup> nanocrystals determined via selected area electron diffraction (SAED) and standard x-ray diffraction (XRD) pattern of cubic NaYbF<sub>4</sub> of JCPDS 77-2043. As shown in Table S1, all the *d*-spacing values of NaYbF<sub>4</sub>:2% Tm<sup>3+</sup> nanocrystals agree well with the standard x-ray diffraction (XRD) pattern of cubic NaYbF<sub>4</sub> of JCPDS 77-2043

| <i>h k l</i> | <i>d</i> -spacing values (nm)                     |                                       |
|--------------|---------------------------------------------------|---------------------------------------|
|              | NaYbF <sub>4</sub> :Tm <sup>3+</sup> 2%<br>(SAED) | Standard XRD pattern<br>JCPDS 77-2043 |
| (111)        | 0.319                                             | 0.313                                 |
| (200)        | 0.273                                             | 0.271                                 |
| (220)        | 0.194                                             | 0.192                                 |
| (311)        | 0.166                                             | 0.163                                 |
| (222)        | 0.159                                             | 0.156                                 |

**Table S2.** *d*-spacing values for NaYbF<sub>4</sub>:Tm<sup>3+</sup>/NaGdF<sub>4</sub> core/shell nanocrystals derived from the SAED pattern and the standard XRD pattern of hexagonal NaGdF<sub>4</sub> of JCPDS 77-2043. As shown in Table S2, nearly all the *d*-spacing values of NaYbF<sub>4</sub>:Tm<sup>3+</sup>/NaGdF<sub>4</sub> core/shell nanocrystals agree well with the standard x-ray diffraction (XRD) pattern of hexagonal NaGdF<sub>4</sub> of JCPDS 77-2043. It should be noted that the *d*-spacing value of the (100) crystal plane deviate a lot from that of the standard hexagonal NaGdF<sub>4</sub> of JCPDS 77-2043. This might be because the crystal of the NaGdF<sub>4</sub> shell adapt itself to grow (100) plane on top of the NaYbF<sub>4</sub> core along the (200) direction.

| <i>h k l</i> | <i>d</i> -spacing values (nm)                     |                                       |
|--------------|---------------------------------------------------|---------------------------------------|
|              | NaYbF <sub>4</sub> :Tm <sup>3+</sup> 2%<br>(SAED) | standard XRD pattern<br>JCPDS 27-0699 |
| (100)        | 0.540                                             | 0.521                                 |
| (110)        | 0.308                                             | 0.301                                 |
| (200)        | 0.267                                             | 0.260                                 |
| (111)        | 0.238                                             | 0.231                                 |
| (201)        | 0.216                                             | 0.212                                 |
| (210)        | 0.202                                             | 0.197                                 |
| (211)        | 0.180                                             | 0.173                                 |

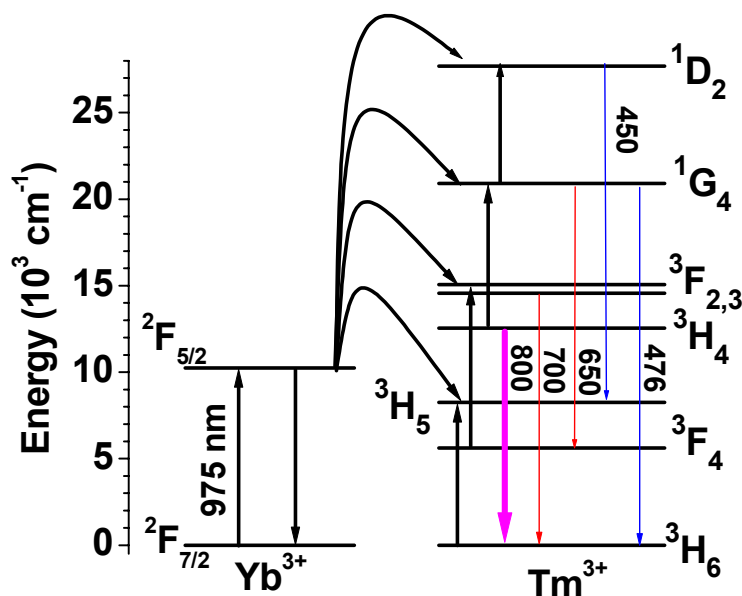

**Figure S3.** Energy level diagrams of  $\text{Yb}^{3+}$  and  $\text{Tm}^{3+}$  ions as well as the proposed upconversion mechanisms. Figure S3 shows the energy levels of the involved  $\text{Yb}^{3+}$  and  $\text{Tm}^{3+}$  ions as well as the proposed UC pathways under diode laser excitation of 975 nm. The pump laser photons of 975 nm can only excite the  $\text{Yb}^{3+}$  ion, because the  $\text{Tm}^{3+}$  ion has no such excited level above its ground state. As pictured in Figure S3, the first energy transfer process from the  $\text{Yb}^{3+}$  to the  $\text{Tm}^{3+}$  ion excites the  ${}^3\text{H}_6$  to the  ${}^3\text{H}_5$  state with the redundant energy dissipated by phonons. Subsequently, the  $\text{Tm}^{3+}$  ion relaxes nonradiatively to the lower  ${}^3\text{F}_4$  state and further populates the  ${}^3\text{F}_{2,3}$  state through a second energy transfer process from the  $\text{Yb}^{3+}$  to the  $\text{Tm}^{3+}$  ion. The weak UC emission at 700 nm is then generated by radiative decay from the  ${}^3\text{F}_{2,3}$  state to the ground state. Additionally, the strong NIR emission at 802 nm arises from the  ${}^3\text{H}_4 \rightarrow {}^3\text{H}_6$  transition where the  ${}^3\text{H}_4$  state is populated by the efficient nonradiative relaxation from the  ${}^3\text{F}_{2,3}$  state. The third process from the  $\text{Yb}^{3+}$  to the  $\text{Tm}^{3+}$  ion excites the  ${}^3\text{H}_4$  to the  ${}^1\text{G}_4$  state from which the 476 and 650 nm UC emissions were generated corresponding to the  ${}^1\text{G}_4 \rightarrow {}^3\text{H}_6$  and  ${}^1\text{G}_4 \rightarrow {}^3\text{F}_4$  transitions,

respectively. Then, the ions at the  $^1G_4$  state can be further promoted to the  $^1D_2$  state by the fourth process from the  $Yb^{3+}$  to the  $Tm^{3+}$  ion, which emits UC emission at 450 nm of the  $^1D_2 \rightarrow ^3F_4$  transition.
